# Supplementary material for: Accelerating surveillance and research of antimicrobial resistance – an online repository for sharing of antimicrobial susceptibility data associated with whole-genome sequences
Source: PubMed Central journal article supplement — Microb Genom. 2020 Apr 7;6(5):e000342. doi: 10.1099/mgen.0.000342 (PMC7371118; doi:10.1099/mgen.0.000342), 2020-04-07
Supplement: mgen-6-342-s001.pdf [file mgen-6-342-s001.pdf]

## Supplementary materials

| MICs  | EUCAST | AMR Data Hub* |
|-------|--------|---------------|
| 0,002 | 14     | 0             |
| 0,004 | 189    | 0             |
| 0,008 | 3967   | 11            |
| 0,016 | 7300   | 331           |
| 0,032 | 1576   | 26            |
| 0,064 | 613    | 9             |
| 0,125 | 566    | 19            |
| 0,25  | 599    | 70            |
| 0,5   | 196    | 24            |
| 1     | 113    | 14            |
| 2     | 55     | 4             |
| 4     | 131    | 10            |
| 8     | 263    | 33            |
| 16    | 236    | 27            |
| 32    | 565    | 122           |
| 64    | 168    | 31            |
| 128   | 85     | 0             |
| 256   | 59     | 0             |
| 512   | 7      | 0             |

Supplementary Table 1: distribution of *E. coli* isolates' minimum inhibitory concentrations in mg/L for ciprofloxacin in EUCAST database (<https://mic.eucast.org/Eucast2/>) and AMR Data Hub (AMR Data Hub accessed on 03/12/2019).

\*values rounded to the nearest EUCAST MIC value.
